# Supplementary material for: Amnion-on-a-chip: modeling human amniotic development in mid-gestation from pluripotent stem cells
Source: Royal Society of Chemistry journal article supplement (doi:10.1039/d0lc00268b), 2020-01-01
Supplement: d0lc00268b1.xlsx [file d0lc00268b1.xlsx]

## Sheet: D10_amnion
Ensembl Gene ID	Gene Symbol
ENSG00000002586	CD99
ENSG00000002587	HS3ST1
ENSG00000003137	CYP26B1
ENSG00000007384	RHBDF1
ENSG00000008513	ST3GAL1
ENSG00000010626	LRRC23
ENSG00000012822	CALCOCO1
ENSG00000013588	GPRC5A
ENSG00000019549	SNAI2
ENSG00000021645	NRXN3
ENSG00000025708	TYMP
ENSG00000030419	IKZF2
ENSG00000039523	RIPOR1
ENSG00000040731	CDH10
ENSG00000041982	TNC
ENSG00000047932	GOPC
ENSG00000049192	ADAMTS6
ENSG00000058668	ATP2B4
ENSG00000059804	SLC2A3
ENSG00000066248	NGEF
ENSG00000068354	TBC1D25
ENSG00000072682	P4HA2
ENSG00000073792	IGF2BP2
ENSG00000075275	CELSR1
ENSG00000075426	FOSL2
ENSG00000079150	FKBP7
ENSG00000085741	WNT11
ENSG00000087903	RFX2
ENSG00000091136	LAMB1
ENSG00000095752	IL11
ENSG00000100196	KDELR3
ENSG00000100842	EFS
ENSG00000101825	MXRA5
ENSG00000102034	ELF4
ENSG00000102760	RGCC
ENSG00000102854	MSLN
ENSG00000104419	NDRG1
ENSG00000104881	PPP1R13L
ENSG00000105519	CAPS
ENSG00000105808	RASA4
ENSG00000105810	CDK6
ENSG00000105971	CAV2
ENSG00000106077	ABHD11
ENSG00000106404	CLDN15
ENSG00000107485	GATA3
ENSG00000109205	ODAM
ENSG00000110002	VWA5A
ENSG00000111186	WNT5B
ENSG00000111339	ART4
ENSG00000111859	NEDD9
ENSG00000111885	MAN1A1
ENSG00000112541	LINC00473; PDE10A
ENSG00000112902	SEMA5A
ENSG00000113196	HAND1
ENSG00000113448	PDE4D
ENSG00000113532	ST8SIA4
ENSG00000114019	AMOTL2
ENSG00000114251	WNT5A
ENSG00000114270	COL7A1
ENSG00000115414	FN1
ENSG00000115461	IGFBP5
ENSG00000115596	WNT6
ENSG00000116285	ERRFI1
ENSG00000116574	RHOU
ENSG00000116663	FBXO6
ENSG00000116774	OLFML3
ENSG00000117868	ESYT2
ENSG00000118503	TNFAIP3
ENSG00000119599	DCAF4
ENSG00000119950	MXI1
ENSG00000120675	DNAJC15
ENSG00000120875	DUSP4
ENSG00000120899	PTK2B
ENSG00000120925	RNF170
ENSG00000121578	B4GALT4
ENSG00000121900	TMEM54
ENSG00000122176	FMOD
ENSG00000122884	P4HA1
ENSG00000123066	MED13L
ENSG00000124920	MYRF
ENSG00000124942	AHNAK
ENSG00000125084	WNT1
ENSG00000125355	TMEM255A
ENSG00000125850	OVOL2
ENSG00000125872	LRRN4
ENSG00000126016	AMOT
ENSG00000127663	KDM4B
ENSG00000127666	TICAM1
ENSG00000129595	EPB41L4A
ENSG00000130363	RSPH3
ENSG00000130600	H19; LOC102724852
ENSG00000130635	COL5A1
ENSG00000130702	LAMA5
ENSG00000131941	RHPN2
ENSG00000131981	LGALS3
ENSG00000132205	EMILIN2
ENSG00000132793	LPIN3
ENSG00000132854	KANK4
ENSG00000133106	EPSTI1
ENSG00000134030	CTIF
ENSG00000134258	VTCN1
ENSG00000135709	KIAA0513
ENSG00000135722	FBXL8
ENSG00000135750	KCNK1
ENSG00000135766	EGLN1
ENSG00000136542	GALNT5
ENSG00000137962	ARHGAP29
ENSG00000138119	MYOF
ENSG00000138434	ITPRID2
ENSG00000138641	HERC3
ENSG00000138772	ANXA3
ENSG00000139793	MBNL2
ENSG00000140044	JDP2
ENSG00000140836	C16orf47; ZFHX3
ENSG00000142765	SYTL1
ENSG00000143320	CRABP2
ENSG00000144152	FBLN7
ENSG00000144426	NBEAL1
ENSG00000144476	ACKR3
ENSG00000144747	TMF1
ENSG00000146197	SCUBE3
ENSG00000146278	PNRC1
ENSG00000146373	RNF217
ENSG00000146674	IGFBP3
ENSG00000147162	OGT
ENSG00000148180	GSN
ENSG00000149499	EML3
ENSG00000149922	TBX6
ENSG00000150477	KIAA1328
ENSG00000151090	THRB
ENSG00000151929	BAG3
ENSG00000153294	ADGRF4
ENSG00000153790	C7orf31
ENSG00000155729	KCTD18
ENSG00000159216	LOC100506403; RUNX1
ENSG00000160932	LY6E
ENSG00000161958	FGF11
ENSG00000162576	MXRA8
ENSG00000162909	CAPN2
ENSG00000162931	TRIM17
ENSG00000163116	STPG2
ENSG00000163191	S100A11
ENSG00000163354	DCST2
ENSG00000163463	KRTCAP2
ENSG00000163521	GLB1L
ENSG00000163637	PRICKLE2
ENSG00000163638	ADAMTS9
ENSG00000163946	TASOR
ENSG00000164283	ESM1
ENSG00000164442	CITED2
ENSG00000164932	CTHRC1
ENSG00000165757	JCAD
ENSG00000165794	SLC39A2
ENSG00000165959	CLMN
ENSG00000166450	PRTG
ENSG00000167074	TEF
ENSG00000167107	ACSF2
ENSG00000167123	CERCAM
ENSG00000167244	IGF2
ENSG00000167306	MYO5B
ENSG00000167323	STIM1
ENSG00000167723	TRPV3
ENSG00000167778	SPRYD3
ENSG00000167779	IGFBP6
ENSG00000167874	TMEM88
ENSG00000168209	DDIT4
ENSG00000168487	BMP1
ENSG00000168542	COL3A1
ENSG00000168672	LRATD2
ENSG00000168938	PPIC
ENSG00000169129	AFAP1L2
ENSG00000169231	THBS3
ENSG00000169635	HIC2
ENSG00000169884	WNT10B
ENSG00000169914	OTUD3
ENSG00000169964	TMEM42
ENSG00000170421	KRT8
ENSG00000170549	IRX1
ENSG00000170667	RASA4B
ENSG00000170820	FSHR
ENSG00000171345	KRT19
ENSG00000171631	P2RY6
ENSG00000172175	MALT1
ENSG00000172201	ID4
ENSG00000172638	EFEMP2
ENSG00000173262	SLC2A14
ENSG00000174332	GLIS1
ENSG00000175505	CLCF1
ENSG00000176170	SPHK1
ENSG00000176907	TCIM
ENSG00000177106	EPS8L2
ENSG00000177694	NAALADL2
ENSG00000177989	ODF3B
ENSG00000178726	THBD
ENSG00000179104	TMTC2
ENSG00000179833	SERTAD2
ENSG00000181143	MUC16
ENSG00000182158	CREB3L2
ENSG00000182351	-
ENSG00000182472	CAPN12
ENSG00000182718	ANXA2
ENSG00000182985	CADM1
ENSG00000183087	GAS6
ENSG00000183691	NOG
ENSG00000183840	GPR39
ENSG00000184347	SLIT3
ENSG00000184349	EFNA5
ENSG00000184363	PKP3
ENSG00000185129	PURA
ENSG00000185522	LMNTD2
ENSG00000185567	AHNAK2
ENSG00000185633	NDUFA4L2
ENSG00000185761	ADAMTSL5
ENSG00000186847	KRT14
ENSG00000186918	ZNF395
ENSG00000187583	PLEKHN1
ENSG00000188086	PRSS45P
ENSG00000188153	COL4A5
ENSG00000188176	SMTNL2
ENSG00000188643	S100A16
ENSG00000189409	MMP23B
ENSG00000189433	GJB4
ENSG00000196154	S100A4
ENSG00000196511	TPK1
ENSG00000197406	DIO3
ENSG00000197565	COL4A6
ENSG00000197712	FAM114A1
ENSG00000197747	S100A10
ENSG00000203780	FANK1
ENSG00000203876	-
ENSG00000204174	NPY4R
ENSG00000204381	LAYN
ENSG00000204682	CASC10
ENSG00000204839	MROH6
ENSG00000205133	TRIQK
ENSG00000205420	KRT6A
ENSG00000206549	-
ENSG00000213199	ASIC3
ENSG00000213468	FIRRE
ENSG00000213574	-
ENSG00000213983	AP1G2
ENSG00000214193	SH3D21
ENSG00000215914	-
ENSG00000218014	-
ENSG00000220378	-
ENSG00000223478	LOC100506100
ENSG00000224594	-
ENSG00000227533	SLC2A1-AS1
ENSG00000228049	POLR2J2
ENSG00000230148	HOXB-AS1
ENSG00000230778	ANKRD63
ENSG00000231991	-
ENSG00000232110	-
ENSG00000239893	-
ENSG00000240583	AQP1
ENSG00000244219	TMEM225B
ENSG00000244280	ECEL1P2
ENSG00000247095	-
ENSG00000247317	-
ENSG00000248019	FAM13A-AS1
ENSG00000248429	FAM198B-AS1
ENSG00000249631	-
ENSG00000249681	-
ENSG00000251023	-
ENSG00000251587	-
ENSG00000254023	-
ENSG00000254202	-
ENSG00000254293	-
ENSG00000254685	FPGT
ENSG00000254815	LOC692247
ENSG00000255983	-
ENSG00000258498	DIO3OS
ENSG00000260244	-
ENSG00000260633	-
ENSG00000261051	-
ENSG00000267265	-

## Sheet: D15_amnion
Ensembl Gene ID	Gene Symbol
ENSG00000002586	CD99
ENSG00000002587	HS3ST1
ENSG00000003137	CYP26B1
ENSG00000005243	COPZ2
ENSG00000005436	GCFC2
ENSG00000006756	ARSD
ENSG00000007384	RHBDF1
ENSG00000008513	ST3GAL1
ENSG00000010626	LRRC23
ENSG00000012822	CALCOCO1
ENSG00000013563	DNASE1L1
ENSG00000013588	GPRC5A
ENSG00000014914	MTMR11
ENSG00000019549	SNAI2
ENSG00000021645	NRXN3
ENSG00000025708	TYMP
ENSG00000030419	IKZF2
ENSG00000039523	RIPOR1
ENSG00000040731	CDH10
ENSG00000041982	TNC
ENSG00000047932	GOPC
ENSG00000049192	ADAMTS6
ENSG00000058668	ATP2B4
ENSG00000059804	SLC2A3
ENSG00000064309	CDON
ENSG00000066248	NGEF
ENSG00000067082	KLF6
ENSG00000067225	PKM
ENSG00000068354	TBC1D25
ENSG00000069869	NEDD4
ENSG00000070159	PTPN3
ENSG00000072682	P4HA2
ENSG00000073792	IGF2BP2
ENSG00000075275	CELSR1
ENSG00000075426	FOSL2
ENSG00000077454	LRCH4
ENSG00000078142	PIK3C3
ENSG00000078401	EDN1
ENSG00000079150	FKBP7
ENSG00000083444	PLOD1
ENSG00000085741	WNT11
ENSG00000087074	PPP1R15A
ENSG00000087903	RFX2
ENSG00000091136	LAMB1
ENSG00000091986	CCDC80
ENSG00000094755	GABRP
ENSG00000095752	IL11
ENSG00000100196	KDELR3
ENSG00000100441	KHNYN
ENSG00000100842	EFS
ENSG00000101825	MXRA5
ENSG00000102034	ELF4
ENSG00000102081	FMR1
ENSG00000102359	SRPX2
ENSG00000102854	MSLN
ENSG00000102908	NFAT5
ENSG00000104419	NDRG1
ENSG00000104881	PPP1R13L
ENSG00000105519	CAPS
ENSG00000105808	RASA4
ENSG00000106077	ABHD11
ENSG00000106404	CLDN15
ENSG00000107485	GATA3
ENSG00000107968	MAP3K8
ENSG00000109205	ODAM
ENSG00000110002	VWA5A
ENSG00000110375	UPK2
ENSG00000110492	MDK
ENSG00000110841	PPFIBP1
ENSG00000111186	WNT5B
ENSG00000111339	ART4
ENSG00000111348	ARHGDIB
ENSG00000111859	NEDD9
ENSG00000111885	MAN1A1
ENSG00000112541	LINC00473; PDE10A
ENSG00000112837	TBX18
ENSG00000113083	LOX
ENSG00000113196	HAND1
ENSG00000113448	PDE4D
ENSG00000113532	ST8SIA4
ENSG00000114019	AMOTL2
ENSG00000114251	WNT5A
ENSG00000114270	COL7A1
ENSG00000115221	ITGB6
ENSG00000115414	FN1
ENSG00000115457	IGFBP2
ENSG00000115461	IGFBP5
ENSG00000115596	WNT6
ENSG00000116017	ARID3A
ENSG00000116574	RHOU
ENSG00000116663	FBXO6
ENSG00000116883	-
ENSG00000117394	SLC2A1
ENSG00000117868	ESYT2
ENSG00000118503	TNFAIP3
ENSG00000118689	FOXO3
ENSG00000119950	MXI1
ENSG00000120129	DUSP1
ENSG00000120549	KIAA1217
ENSG00000120708	TGFBI
ENSG00000120875	DUSP4
ENSG00000120899	PTK2B
ENSG00000120910	PPP3CC
ENSG00000120925	RNF170
ENSG00000121900	TMEM54
ENSG00000122176	FMOD
ENSG00000122585	NPY
ENSG00000122884	P4HA1
ENSG00000123066	MED13L
ENSG00000123240	OPTN
ENSG00000124243	BCAS4
ENSG00000124920	MYRF
ENSG00000124942	AHNAK
ENSG00000125084	WNT1
ENSG00000125266	EFNB2
ENSG00000125355	TMEM255A
ENSG00000125872	LRRN4
ENSG00000126016	AMOT
ENSG00000126458	RRAS
ENSG00000126705	AHDC1
ENSG00000127663	KDM4B
ENSG00000127666	TICAM1
ENSG00000129194	SOX15
ENSG00000129595	EPB41L4A
ENSG00000130363	RSPH3
ENSG00000130487	KLHDC7B
ENSG00000130600	H19; LOC102724852
ENSG00000130635	COL5A1
ENSG00000130702	LAMA5
ENSG00000131981	LGALS3
ENSG00000132002	DNAJB1
ENSG00000132205	EMILIN2
ENSG00000132793	LPIN3
ENSG00000132854	KANK4
ENSG00000133106	EPSTI1
ENSG00000134030	CTIF
ENSG00000134107	BHLHE40
ENSG00000134258	VTCN1
ENSG00000134333	LDHA
ENSG00000134504	KCTD1
ENSG00000134531	EMP1
ENSG00000134627	PIWIL4
ENSG00000135046	ANXA1
ENSG00000135709	KIAA0513
ENSG00000135722	FBXL8
ENSG00000135766	EGLN1
ENSG00000136155	SCEL
ENSG00000136542	GALNT5
ENSG00000137962	ARHGAP29
ENSG00000138119	MYOF
ENSG00000138395	CDK15
ENSG00000138434	ITPRID2
ENSG00000138448	ITGAV
ENSG00000138641	HERC3
ENSG00000138764	CCNG2
ENSG00000139793	MBNL2
ENSG00000140015	KCNH5
ENSG00000140836	C16orf47; ZFHX3
ENSG00000141068	KSR1
ENSG00000141258	SGSM2
ENSG00000142046	TMEM91
ENSG00000142694	EVA1B
ENSG00000142765	SYTL1
ENSG00000143217	NECTIN4
ENSG00000143320	CRABP2
ENSG00000143507	DUSP10
ENSG00000143816	WNT9A
ENSG00000143867	OSR1
ENSG00000144152	FBLN7
ENSG00000144320	LNPK
ENSG00000144476	ACKR3
ENSG00000144747	TMF1
ENSG00000145147	SLIT2
ENSG00000145287	PLAC8
ENSG00000146197	SCUBE3
ENSG00000146278	PNRC1
ENSG00000146373	RNF217
ENSG00000146674	IGFBP3
ENSG00000147162	OGT
ENSG00000148180	GSN
ENSG00000148341	SH3GLB2
ENSG00000149218	ENDOD1
ENSG00000149289	ZC3H12C
ENSG00000149499	EML3
ENSG00000149922	TBX6
ENSG00000150687	PRSS23
ENSG00000151090	THRB
ENSG00000151929	BAG3
ENSG00000153294	ADGRF4
ENSG00000155066	PROM2
ENSG00000155729	KCTD18
ENSG00000156030	ELMSAN1
ENSG00000156218	ADAMTSL3
ENSG00000159216	LOC100506403; RUNX1
ENSG00000160271	RALGDS
ENSG00000160588	MPZL3
ENSG00000160789	LMNA
ENSG00000160932	LY6E
ENSG00000161958	FGF11
ENSG00000162576	MXRA8
ENSG00000162645	GBP2
ENSG00000162909	CAPN2
ENSG00000162931	TRIM17
ENSG00000163116	STPG2
ENSG00000163141	BNIPL
ENSG00000163354	DCST2
ENSG00000163463	KRTCAP2
ENSG00000163521	GLB1L
ENSG00000163637	PRICKLE2
ENSG00000163638	ADAMTS9
ENSG00000163946	TASOR
ENSG00000164023	SGMS2
ENSG00000164283	ESM1
ENSG00000164442	CITED2
ENSG00000164603	BMT2
ENSG00000164692	COL1A2
ENSG00000164932	CTHRC1
ENSG00000165757	JCAD
ENSG00000165794	SLC39A2
ENSG00000165959	CLMN
ENSG00000166147	FBN1
ENSG00000166450	PRTG
ENSG00000166546	BEAN1
ENSG00000167074	TEF
ENSG00000167107	ACSF2
ENSG00000167123	CERCAM
ENSG00000167244	IGF2
ENSG00000167306	MYO5B
ENSG00000167323	STIM1
ENSG00000167595	PROSER3
ENSG00000167601	AXL
ENSG00000167723	TRPV3
ENSG00000167779	IGFBP6
ENSG00000167874	TMEM88
ENSG00000167916	KRT24
ENSG00000168056	LTBP3
ENSG00000168209	DDIT4
ENSG00000168487	BMP1
ENSG00000168542	COL3A1
ENSG00000168672	LRATD2
ENSG00000169129	AFAP1L2
ENSG00000169231	THBS3
ENSG00000169635	HIC2
ENSG00000169884	WNT10B
ENSG00000169914	OTUD3
ENSG00000169964	TMEM42
ENSG00000170214	ADRA1B
ENSG00000170345	FOS
ENSG00000170421	KRT8
ENSG00000170485	NPAS2
ENSG00000170549	IRX1
ENSG00000170667	RASA4B
ENSG00000170820	FSHR
ENSG00000171121	KCNMB3
ENSG00000171345	KRT19
ENSG00000171631	P2RY6
ENSG00000172175	MALT1
ENSG00000172201	ID4
ENSG00000172476	RAB40A
ENSG00000172638	EFEMP2
ENSG00000173262	SLC2A14
ENSG00000174282	ZBTB4
ENSG00000175505	CLCF1
ENSG00000176170	SPHK1
ENSG00000176845	METRNL
ENSG00000176907	TCIM
ENSG00000176978	DPP7
ENSG00000177106	EPS8L2
ENSG00000177606	JUN
ENSG00000177694	NAALADL2
ENSG00000177989	ODF3B
ENSG00000178726	THBD
ENSG00000179104	TMTC2
ENSG00000179833	SERTAD2
ENSG00000180176	TH
ENSG00000181143	MUC16
ENSG00000181634	TNFSF15
ENSG00000181690	PLAG1
ENSG00000182351	-
ENSG00000182472	CAPN12
ENSG00000182985	CADM1
ENSG00000182993	C12orf60
ENSG00000183087	GAS6
ENSG00000183340	JRKL
ENSG00000183691	NOG
ENSG00000184292	TACSTD2
ENSG00000184347	SLIT3
ENSG00000184349	EFNA5
ENSG00000184363	PKP3
ENSG00000184564	SLITRK6
ENSG00000185129	PURA
ENSG00000185522	LMNTD2
ENSG00000185567	AHNAK2
ENSG00000185633	NDUFA4L2
ENSG00000185761	ADAMTSL5
ENSG00000185950	IRS2
ENSG00000186081	KRT5
ENSG00000186352	ANKRD37
ENSG00000186847	KRT14
ENSG00000186918	ZNF395
ENSG00000187583	PLEKHN1
ENSG00000187714	SLC18A3
ENSG00000188086	PRSS45P
ENSG00000188153	COL4A5
ENSG00000188176	SMTNL2
ENSG00000188643	S100A16
ENSG00000189143	CLDN4
ENSG00000189409	MMP23B
ENSG00000196154	S100A4
ENSG00000196511	TPK1
ENSG00000196878	LAMB3
ENSG00000197217	ENTPD4
ENSG00000197301	HMGA2-AS1
ENSG00000197406	DIO3
ENSG00000197496	SLC2A10
ENSG00000197530	MIB2
ENSG00000197565	COL4A6
ENSG00000197712	FAM114A1
ENSG00000198355	PIM3
ENSG00000198743	SLC5A3
ENSG00000203780	FANK1
ENSG00000204381	LAYN
ENSG00000204682	CASC10
ENSG00000204706	-
ENSG00000204839	MROH6
ENSG00000204852	TCTN1
ENSG00000205133	TRIQK
ENSG00000205420	KRT6A
ENSG00000205978	NYNRIN
ENSG00000206549	-
ENSG00000213199	ASIC3
ENSG00000213468	FIRRE
ENSG00000213574	-
ENSG00000213928	IRF9
ENSG00000213983	AP1G2
ENSG00000214193	SH3D21
ENSG00000215914	-
ENSG00000218014	-
ENSG00000218416	LOC100130449
ENSG00000220378	-
ENSG00000222009	BTBD19
ENSG00000224594	-
ENSG00000224940	PRRT4
ENSG00000225511	-
ENSG00000225830	ERCC6; PGBD3
ENSG00000226237	GAS1RR
ENSG00000226416	MRPL23-AS1
ENSG00000227279	-
ENSG00000227533	SLC2A1-AS1
ENSG00000228049	POLR2J2
ENSG00000228486	C2orf92
ENSG00000229124	VIM-AS1
ENSG00000230148	HOXB-AS1
ENSG00000230778	ANKRD63
ENSG00000231213	PLSCR5
ENSG00000235649	-
ENSG00000236204	LINC01376
ENSG00000239523	MYLK-AS1
ENSG00000239893	-
ENSG00000240583	AQP1
ENSG00000243279	PRAF2
ENSG00000244219	TMEM225B
ENSG00000244280	ECEL1P2
ENSG00000247095	-
ENSG00000247317	-
ENSG00000248019	FAM13A-AS1
ENSG00000248429	FAM198B-AS1
ENSG00000249267	LINC00939
ENSG00000249631	-
ENSG00000249681	-
ENSG00000251023	-
ENSG00000251432	LINC02615
ENSG00000251587	-
ENSG00000254023	-
ENSG00000254202	-
ENSG00000254293	-
ENSG00000254685	FPGT
ENSG00000254815	LOC692247
ENSG00000255983	-
ENSG00000258498	DIO3OS
ENSG00000258839	MC1R
ENSG00000260244	-
ENSG00000260633	-
ENSG00000261051	-
ENSG00000261116	-
ENSG00000262454	-
ENSG00000267519	-
ENSG00000267796	LIN37

## Sheet: D20_amnion
Ensembl Gene ID	Gene Symbol
ENSG00000002586	CD99
ENSG00000003137	CYP26B1
ENSG00000005243	COPZ2
ENSG00000005436	GCFC2
ENSG00000006756	ARSD
ENSG00000007384	RHBDF1
ENSG00000008513	ST3GAL1
ENSG00000010626	LRRC23
ENSG00000012822	CALCOCO1
ENSG00000013588	GPRC5A
ENSG00000014914	MTMR11
ENSG00000019549	SNAI2
ENSG00000021645	NRXN3
ENSG00000025708	TYMP
ENSG00000030419	IKZF2
ENSG00000039523	RIPOR1
ENSG00000040731	CDH10
ENSG00000041982	TNC
ENSG00000047932	GOPC
ENSG00000049192	ADAMTS6
ENSG00000058668	ATP2B4
ENSG00000059804	SLC2A3
ENSG00000064309	CDON
ENSG00000066248	NGEF
ENSG00000067082	KLF6
ENSG00000067225	PKM
ENSG00000068354	TBC1D25
ENSG00000069869	NEDD4
ENSG00000072682	P4HA2
ENSG00000073792	IGF2BP2
ENSG00000075275	CELSR1
ENSG00000075426	FOSL2
ENSG00000078142	PIK3C3
ENSG00000078401	EDN1
ENSG00000085741	WNT11
ENSG00000087074	PPP1R15A
ENSG00000087494	PTHLH
ENSG00000087903	RFX2
ENSG00000091136	LAMB1
ENSG00000091986	CCDC80
ENSG00000094755	GABRP
ENSG00000095752	IL11
ENSG00000100441	KHNYN
ENSG00000100842	EFS
ENSG00000101825	MXRA5
ENSG00000102034	ELF4
ENSG00000102081	FMR1
ENSG00000102359	SRPX2
ENSG00000102854	MSLN
ENSG00000104419	NDRG1
ENSG00000104881	PPP1R13L
ENSG00000105519	CAPS
ENSG00000105808	RASA4
ENSG00000106077	ABHD11
ENSG00000107485	GATA3
ENSG00000107968	MAP3K8
ENSG00000110375	UPK2
ENSG00000110492	MDK
ENSG00000111186	WNT5B
ENSG00000111339	ART4
ENSG00000111341	MGP
ENSG00000111348	ARHGDIB
ENSG00000111859	NEDD9
ENSG00000111885	MAN1A1
ENSG00000112541	LINC00473; PDE10A
ENSG00000113083	LOX
ENSG00000113196	HAND1
ENSG00000113448	PDE4D
ENSG00000113532	ST8SIA4
ENSG00000114019	AMOTL2
ENSG00000114251	WNT5A
ENSG00000114270	COL7A1
ENSG00000115221	ITGB6
ENSG00000115457	IGFBP2
ENSG00000115461	IGFBP5
ENSG00000115596	WNT6
ENSG00000116574	RHOU
ENSG00000116774	OLFML3
ENSG00000117394	SLC2A1
ENSG00000117868	ESYT2
ENSG00000118689	FOXO3
ENSG00000118971	CCND2
ENSG00000119950	MXI1
ENSG00000120129	DUSP1
ENSG00000120549	KIAA1217
ENSG00000120708	TGFBI
ENSG00000120875	DUSP4
ENSG00000120899	PTK2B
ENSG00000120910	PPP3CC
ENSG00000120925	RNF170
ENSG00000121900	TMEM54
ENSG00000122176	FMOD
ENSG00000122884	P4HA1
ENSG00000123066	MED13L
ENSG00000123240	OPTN
ENSG00000124942	AHNAK
ENSG00000125084	WNT1
ENSG00000125266	EFNB2
ENSG00000125355	TMEM255A
ENSG00000126016	AMOT
ENSG00000126368	NR1D1
ENSG00000126458	RRAS
ENSG00000126705	AHDC1
ENSG00000127663	KDM4B
ENSG00000127666	TICAM1
ENSG00000130363	RSPH3
ENSG00000130600	H19; LOC102724852
ENSG00000130635	COL5A1
ENSG00000132002	DNAJB1
ENSG00000132205	EMILIN2
ENSG00000132793	LPIN3
ENSG00000132854	KANK4
ENSG00000133106	EPSTI1
ENSG00000134030	CTIF
ENSG00000134107	BHLHE40
ENSG00000134258	VTCN1
ENSG00000134333	LDHA
ENSG00000134504	KCTD1
ENSG00000134531	EMP1
ENSG00000135046	ANXA1
ENSG00000135362	PRR5L
ENSG00000135709	KIAA0513
ENSG00000135722	FBXL8
ENSG00000135766	EGLN1
ENSG00000136155	SCEL
ENSG00000137962	ARHGAP29
ENSG00000138119	MYOF
ENSG00000138434	ITPRID2
ENSG00000138641	HERC3
ENSG00000138764	CCNG2
ENSG00000139793	MBNL2
ENSG00000140836	C16orf47; ZFHX3
ENSG00000141258	SGSM2
ENSG00000142046	TMEM91
ENSG00000142694	EVA1B
ENSG00000142765	SYTL1
ENSG00000143217	NECTIN4
ENSG00000143320	CRABP2
ENSG00000143507	DUSP10
ENSG00000143816	WNT9A
ENSG00000143867	OSR1
ENSG00000144152	FBLN7
ENSG00000144320	LNPK
ENSG00000144426	NBEAL1
ENSG00000144476	ACKR3
ENSG00000145147	SLIT2
ENSG00000146197	SCUBE3
ENSG00000146278	PNRC1
ENSG00000146373	RNF217
ENSG00000146674	IGFBP3
ENSG00000148180	GSN
ENSG00000149289	ZC3H12C
ENSG00000149922	TBX6
ENSG00000150687	PRSS23
ENSG00000151090	THRB
ENSG00000153790	C7orf31
ENSG00000155066	PROM2
ENSG00000155622	XAGE2
ENSG00000155729	KCTD18
ENSG00000159216	LOC100506403; RUNX1
ENSG00000160271	RALGDS
ENSG00000161958	FGF11
ENSG00000162576	MXRA8
ENSG00000162909	CAPN2
ENSG00000162931	TRIM17
ENSG00000163116	STPG2
ENSG00000163141	BNIPL
ENSG00000163354	DCST2
ENSG00000163521	GLB1L
ENSG00000163637	PRICKLE2
ENSG00000163638	ADAMTS9
ENSG00000163946	TASOR
ENSG00000164023	SGMS2
ENSG00000164283	ESM1
ENSG00000164442	CITED2
ENSG00000164603	BMT2
ENSG00000164692	COL1A2
ENSG00000164932	CTHRC1
ENSG00000165757	JCAD
ENSG00000165794	SLC39A2
ENSG00000165959	CLMN
ENSG00000166147	FBN1
ENSG00000166450	PRTG
ENSG00000166546	BEAN1
ENSG00000167074	TEF
ENSG00000167107	ACSF2
ENSG00000167123	CERCAM
ENSG00000167244	IGF2
ENSG00000167306	MYO5B
ENSG00000167595	PROSER3
ENSG00000167601	AXL
ENSG00000167723	TRPV3
ENSG00000167874	TMEM88
ENSG00000168209	DDIT4
ENSG00000168487	BMP1
ENSG00000168542	COL3A1
ENSG00000168672	LRATD2
ENSG00000169231	THBS3
ENSG00000169884	WNT10B
ENSG00000169914	OTUD3
ENSG00000169964	TMEM42
ENSG00000170214	ADRA1B
ENSG00000170421	KRT8
ENSG00000170485	NPAS2
ENSG00000170549	IRX1
ENSG00000170667	RASA4B
ENSG00000171345	KRT19
ENSG00000171631	P2RY6
ENSG00000172175	MALT1
ENSG00000172201	ID4
ENSG00000172476	RAB40A
ENSG00000172638	EFEMP2
ENSG00000173262	SLC2A14
ENSG00000175505	CLCF1
ENSG00000176170	SPHK1
ENSG00000176907	TCIM
ENSG00000177606	JUN
ENSG00000177694	NAALADL2
ENSG00000177989	ODF3B
ENSG00000179104	TMTC2
ENSG00000179833	SERTAD2
ENSG00000180176	TH
ENSG00000181143	MUC16
ENSG00000181634	TNFSF15
ENSG00000181690	PLAG1
ENSG00000182351	-
ENSG00000182472	CAPN12
ENSG00000182985	CADM1
ENSG00000183087	GAS6
ENSG00000183691	NOG
ENSG00000184292	TACSTD2
ENSG00000184347	SLIT3
ENSG00000184349	EFNA5
ENSG00000184564	SLITRK6
ENSG00000185129	PURA
ENSG00000185522	LMNTD2
ENSG00000185567	AHNAK2
ENSG00000185633	NDUFA4L2
ENSG00000185761	ADAMTSL5
ENSG00000186352	ANKRD37
ENSG00000186847	KRT14
ENSG00000186918	ZNF395
ENSG00000187583	PLEKHN1
ENSG00000188001	TPRG1
ENSG00000188153	COL4A5
ENSG00000188176	SMTNL2
ENSG00000189143	CLDN4
ENSG00000189409	MMP23B
ENSG00000196154	S100A4
ENSG00000196878	LAMB3
ENSG00000197217	ENTPD4
ENSG00000197406	DIO3
ENSG00000197530	MIB2
ENSG00000197565	COL4A6
ENSG00000198355	PIM3
ENSG00000198743	SLC5A3
ENSG00000203780	FANK1
ENSG00000204381	LAYN
ENSG00000204682	CASC10
ENSG00000204706	-
ENSG00000204852	TCTN1
ENSG00000205133	TRIQK
ENSG00000205420	KRT6A
ENSG00000205978	NYNRIN
ENSG00000206549	-
ENSG00000213199	ASIC3
ENSG00000213468	FIRRE
ENSG00000213574	-
ENSG00000213928	IRF9
ENSG00000213983	AP1G2
ENSG00000214193	SH3D21
ENSG00000215914	-
ENSG00000218014	-
ENSG00000218416	LOC100130449
ENSG00000222009	BTBD19
ENSG00000224940	PRRT4
ENSG00000225069	-
ENSG00000225302	-
ENSG00000225830	ERCC6; PGBD3
ENSG00000226237	GAS1RR
ENSG00000226416	MRPL23-AS1
ENSG00000227533	SLC2A1-AS1
ENSG00000228486	C2orf92
ENSG00000229124	VIM-AS1
ENSG00000230148	HOXB-AS1
ENSG00000230778	ANKRD63
ENSG00000231213	PLSCR5
ENSG00000233836	-
ENSG00000236204	LINC01376
ENSG00000239893	-
ENSG00000240583	AQP1
ENSG00000241852	C8orf58
ENSG00000243279	PRAF2
ENSG00000244219	TMEM225B
ENSG00000244280	ECEL1P2
ENSG00000247095	-
ENSG00000247317	-
ENSG00000248019	FAM13A-AS1
ENSG00000248429	FAM198B-AS1
ENSG00000249267	LINC00939
ENSG00000251023	-
ENSG00000251587	-
ENSG00000254023	-
ENSG00000254202	-
ENSG00000254293	-
ENSG00000254685	FPGT
ENSG00000254815	LOC692247
ENSG00000255983	-
ENSG00000258498	DIO3OS
ENSG00000258839	MC1R
ENSG00000260244	-
ENSG00000260633	-
ENSG00000261051	-
ENSG00000261116	-
ENSG00000261408	TEN1-CDK3
