# Supplementary material for: Amnion-on-a-chip: modeling human amniotic development in mid-gestation from pluripotent stem cells
Source: Royal Society of Chemistry journal article supplement (doi:10.1039/d0lc00268b), 2020-01-01
Supplement: d0lc00268b4.csv [file d0lc00268b4.csv]

	x		Gene Symbol
1	ENSG00000003137		CYP26B1
2	ENSG00000054598		FOXC1	vascular
3	ENSG00000065618		COL17A1	matrix
4	ENSG00000085552		IGSF9
5	ENSG00000102362		SYTL4
6	ENSG00000104419		NDRG1
7	ENSG00000111859		NEDD9
8	ENSG00000114166		KAT2B
9	ENSG00000116711		PLA2G4A
10	ENSG00000120549		KIAA1217
11	ENSG00000122861		PLAU
12	ENSG00000123146		ADGRE5
13	ENSG00000130595		TNNT3
14	ENSG00000134531		EMP1
15	ENSG00000137449		CPEB2
16	ENSG00000137699		TRIM29
17	ENSG00000138798		EGF
18	ENSG00000146674		IGFBP3
19	ENSG00000158055		GRHL3
20	ENSG00000167157		PRRX2
21	ENSG00000169231		THBS3
22	ENSG00000170345		FOS
23	ENSG00000180176		TH
24	ENSG00000183691		NOG
25	ENSG00000184292		TACSTD2
26	ENSG00000184564		SLITRK6
27	ENSG00000204103		MAFB
28	ENSG00000242732		RTL5
29	ENSG00000248905		FMN1
